# Supplementary material for: NOS1AP Interacts with α-Synuclein and Aggregates in Yeast and Mammalian Cells
Source: MDPI journal article supplement (doi:10.3390/ijms23169102), 2022-08-14
Supplement: s1 [file s1]

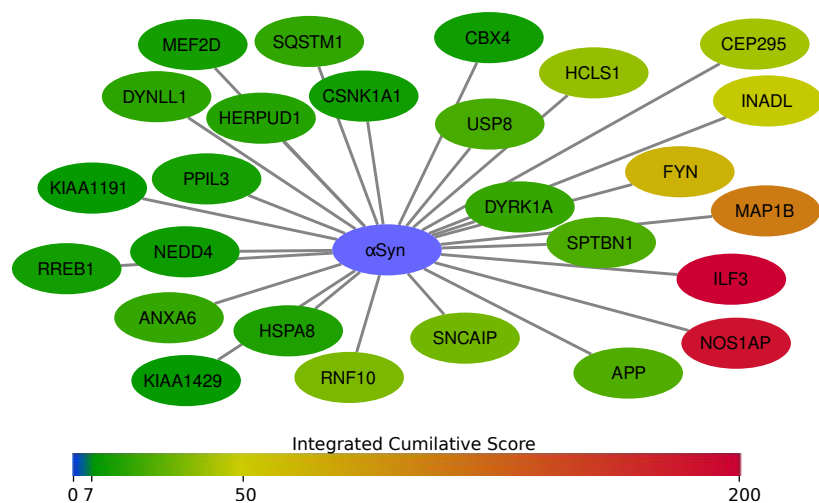

**Figure S1.** Network of potentially amyloidogenic proteins physically interacting with  $\alpha$ -synuclein ( $\alpha$ Syn). Node color corresponds to the Integrated Cumulative Score for a protein, calculated with ArchCandy. The ArchCandy Cumulative Score reflects the ability of the protein to form  $\beta$ -arches.
